# Supplementary material for: Kognitives Training mit Kindern: Die Bedeutung von Need for Cognition
Source: Atypon-hosted journal article supplement (doi:10.1024/1010-0652/a000340), 2022-01-13
Supplement: 1010-0652_a000340_esm1.pdf [file 1010-0652_a000340_esm1.pdf]

## **Elektronisches Supplement (ESM) 1**

Tabelle E1

*Korrelationen zwischen den Gesamtergebnissen im CFT 1-R und im NFC-KIDS zu allen Messzeitpunkten*

|                            | CFT 1-R <sub>(prä)</sub> | CFT 1-R <sub>(post)</sub> | CFT 1-R <sub>(FU)</sub> | NFC-KIDS <sub>(prä)</sub> | NFC-KIDS <sub>(post)</sub> | NFC-KIDS <sub>(FU)</sub> |
|----------------------------|--------------------------|---------------------------|-------------------------|---------------------------|----------------------------|--------------------------|
| CFT 1-R <sub>(prä)</sub>   | 1                        | 0.76*                     | .57*                    | .21*                      | .20*                       | .04                      |
| CFT 1-R <sub>(post)</sub>  |                          | 1                         | .60*                    | .27*                      | .19*                       | .09                      |
| CFT 1-R <sub>(FU)</sub>    |                          |                           | 1                       | .21                       | -.03                       | .14                      |
| NFC-KIDS <sub>(prä)</sub>  |                          |                           |                         | 1                         | .58*                       | .48*                     |
| NFC-KIDS <sub>(post)</sub> |                          |                           |                         |                           | 1                          | .51*                     |
| NFC-KIDS <sub>(FU)</sub>   |                          |                           |                         |                           |                            | 1                        |

*Anmerkungen.* NFC: Need For Cognition. Angegeben sind stets bivariate Pearson-Korrelationskoeffizienten. \* auf dem Niveau von  $p < .05$  signifikant.

Tabelle E2

Effekte  $d_{EG \text{ vs. } WKG}$  der Veränderungen von Prä- zu Posttest bzw. von Prätest zu Follow-Up im CFT 1-R

| Veränderung          | Stichprobe                     | $d_{EG \text{ vs. } WKG(Klauer)}$ | $d_{EG \text{ vs. } WKG(Cohen)}$ |
|----------------------|--------------------------------|-----------------------------------|----------------------------------|
| Von Prä zu Post      |                                |                                   |                                  |
|                      | alle Kinder                    | 0.39                              | 0.57                             |
|                      | nur Kinder mit FU <sup>a</sup> | 0.46                              | 0.58                             |
| Von Prä zu Follow up |                                |                                   |                                  |
|                      | alle Kinder                    | 0.09                              | 0.07                             |
|                      | nur Kinder mit FU <sup>a</sup> | -0.13                             | -0.19                            |

Anmerkungen. <sup>a</sup> Berücksichtigt wurden nur Kinder, die alle drei Testzeitpunkte absolvierten; FU: Follow-up.

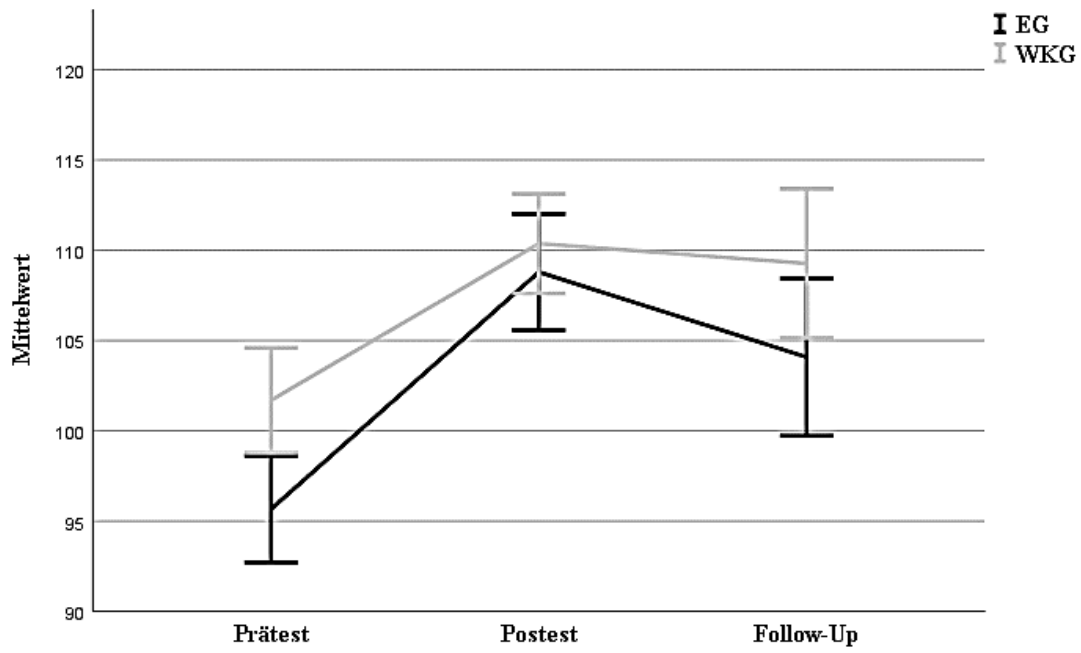

Abbildung E1. Veränderungen im CFT 1-R über die drei Messzeitpunkte hinweg. Fehlerbalken entsprechen 95%-Konfidenzintervall.

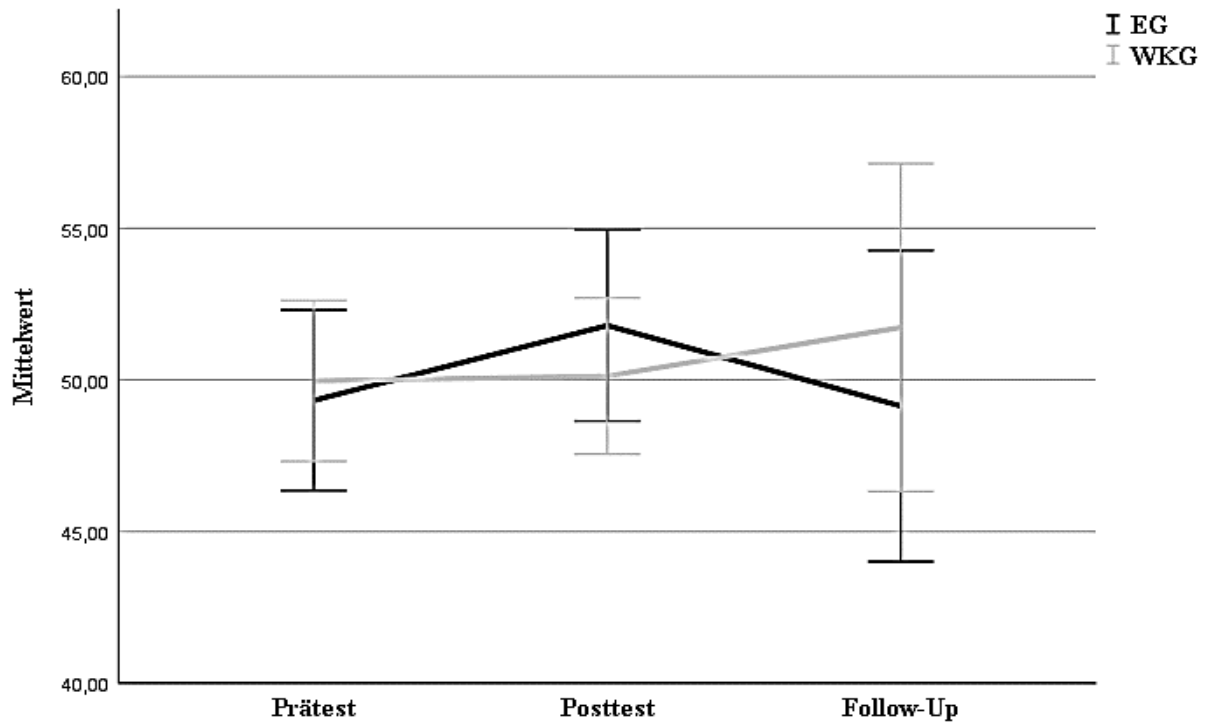

Abbildung E2. Veränderungen im NFC-KIDS über die drei Messzeitpunkte hinweg. Fehlerbalken entsprechen 95%-Konfidenzintervall.
